# Supplementary material for: Chronic overlapping pain conditions increase the risk of long COVID features, regardless of acute COVID status
Source: PubMed Central journal article supplement — Pain. 2023 Nov 9;165(5):1112–20. doi: 10.1097/j.pain.0000000000003110 (PMC11017744; doi:10.1097/j.pain.0000000000003110), 2023-11-09
Supplement: jop-165-1112-s001.pdf [file jop-165-1112-s001.pdf]

**Supplemental Table 1. The COVID cohort identification codes**

---

**ICD-10 code (ICD-9 code)**

---

J12.82

B34.2

B97.29

J12.81 (480.3)

U07.1

---

**LOINC**

---

94307-6

94308-4

94309-2

94310-0

94314-2

94315-9

94316-7

94500-6

94502-2

94533-7

94534-5

94559-2

94565-9

94647-5, 94639-2

94758-0

94759-8

94760-6

94845-5

95406-5

95409-9

95608-6

96123-5

96763-8

---

ICD = International Classification of Diseases; LOINC =  
Laboratory observation identifiers name codes

**Supplemental Table 2.** The influenza cohort identification codes

---

**ICD-10 code (ICD-9 code)**

---

J09 (488.0, 488.1, 488.8, 488.01, 488.02, 488.09, 488.19, 488.81, 488.82, 488.89)

J10 (488.11, 487.1, 488.12)

J11 (487.0, 487.1, 487.8)

---

**LOINC**

---

62462-7

40982-1

82170-2

76080-1

76079-3

38382-8

80588-7

34487-9

92142-9

82166-0

49531-7

76078-5

48310-7

55465-9

82168-6

77028-9

82169-4

77027-1

49523-4

49524-2

49521-8

82167-8

49520-0

77026-3

38381-0

---

ICD = International Classification of Diseases; LOINC = Laboratory observation  
identifiers name codes

**Supplemental Table 3.** The non-infected cohort identification codes

---

**Current procedural terminology**

99393-99397

---

**Supplemental Table 4.** ICD Phenotype codes for chronic overlapping pain conditions (COPCs)

| <b>COPC</b>                                 | <b>ICD-10 (ICD-9)</b>                                                                                                                       |
|---------------------------------------------|---------------------------------------------------------------------------------------------------------------------------------------------|
| Fibromyalgia                                | M79.7                                                                                                                                       |
| Irritable bowel syndrome                    | K58.0, K58.1, K58.2, K58.8, K58.9 (564.1)                                                                                                   |
| Interstitial cystitis/Bladder pain syndrome | N30.10 (595.1), N30.30 (595.3)                                                                                                              |
| Chronic prostatitis                         | N41.1                                                                                                                                       |
| Vulvodynia                                  | N94.810, N94.818, N94.819                                                                                                                   |
| Migraine                                    | G43.XXX, except for G43.6- for cerebral infarct or G43.A- for cyclical vomiting                                                             |
| Chronic tension-type headache               | G44.201, G44.209, G44.211, G44.219, G44.221 (339.12), G44.229 (339.12)                                                                      |
| Temporomandibular disorder                  | M26.60 (524.60), M26.62 (524.62), M26.63 (524.63)                                                                                           |
| Temporomandibular joint disorder            | S03.0XXA                                                                                                                                    |
| Chronic low back pain                       | M54.5, M54.40, M54.41, M54.42, M54.89                                                                                                       |
| Chronic fatigue syndrome                    | R53.82 (780.71)                                                                                                                             |
| Endometriosis with pain                     | N80.XXX and one or more of the following: R10.2 (608.9, 625.9, 789.09), N94.4, N94.5, N94.6 (625.3), N94.10 (625.0), N94.11, N94.12, N94.19 |

**Supplemental Table 5.** ICD Phenotype codes for long COVID features

| <b>Long COVID features</b> | <b>ICD-10 (ICD-9)</b>                                                                                                                                                                                                                                                                                                                                                                                                                                                                                                                                                                                                                                                                    |
|----------------------------|------------------------------------------------------------------------------------------------------------------------------------------------------------------------------------------------------------------------------------------------------------------------------------------------------------------------------------------------------------------------------------------------------------------------------------------------------------------------------------------------------------------------------------------------------------------------------------------------------------------------------------------------------------------------------------------|
| Cognitive Symptoms         | F01 (290.4, 290.40, 290.41, 290.42, 290.43), F02 (294.1, 294.10, 294.11), F03 (290, 290.0, 290.10, 290.11, 290.12, 290.13, 290.20, 290.21, 290.3, 290.8, 290.9, 294.2, 294.20, 294.21), F05 (290.12, 290.20, 290.3, 293.0, 293.1), F06.0 (293.82, 294.8), G30 (331.0), G31.83, G31.84 (331.83), G93.40 (348.30)                                                                                                                                                                                                                                                                                                                                                                          |
| Breathing difficulties     | R06 (786, 786.0, 786.00, 786.01, 786.02, 786.03, 786.04, 786.05, 786.06, 786.07, 786.09, 786.1, 784, 784.9, 784.99, 786.8, 786.9)                                                                                                                                                                                                                                                                                                                                                                                                                                                                                                                                                        |
| Pain in throat and chest   | R07 (784.1, 786.5, 786.50, 786.51, 786.52, 786.59)                                                                                                                                                                                                                                                                                                                                                                                                                                                                                                                                                                                                                                       |
| Abdominal symptoms         | R10 (789.0, 789.00, 789.01, 789.02, 789.03, 789.04, 789.05, 789.06, 789.07, 789.09, 789.6, 789.60, 789.61, 789.62, 789.63, 789.64, 789.65, 789.66, 789.67, 789.69, 789.7, 608, 608.9, 625, 625.9), R19.4 (787.99), R19.7 (787.91), R40 (780.0, 780.01, 780.02, 780.03, 780.09), R41 (780.93, 780.97, 781.8, 797, 799.5, 799.51, 799.52, 799.53, 799.54, 799.55, 799.59), R48 (315.01, 784.6, 784.60, 784.61, 784.69, 368.16)                                                                                                                                                                                                                                                             |
| Fatigue                    | G93.3 (780.79), R53 (780.72, 780.79, 799.3, 780.71, 780.7)                                                                                                                                                                                                                                                                                                                                                                                                                                                                                                                                                                                                                               |
| Anxiety                    | F41 (300.0, 300.00, 300.01, 300.02, 300.09)                                                                                                                                                                                                                                                                                                                                                                                                                                                                                                                                                                                                                                              |
| Depression                 | F32 (296.2, 296.20, 296.21, 296.22, 296.23, 296.24, 298.0, 296.25, 296.26, 296.82, 311), F33 (296.3, 296.30, 296.31, 296.32, 296.33, 296.34, 296.35, 296.36, 298.0)                                                                                                                                                                                                                                                                                                                                                                                                                                                                                                                      |
| Pain                       | G89 (338, 338.0, 338.11, 338.12, 338.18, 338.2, 338.21, 338.22, 338.28, 338.29, 338.3, 338.4), R52 (338.1, 338.19, 780.96)                                                                                                                                                                                                                                                                                                                                                                                                                                                                                                                                                               |
| Headache                   | G43 (346, 346.0, 346.00, 346.01, 346.02, 346.03, 346.1, 346.10, 346.11, 346.12, 346.13, 346.2, 346.20, 346.21, 346.22, 346.23, 346.3, 346.30, 346.31, 346.32, 346.33, 346.4, 346.40, 346.41, 346.42, 346.43, 346.5, 346.50, 346.51, 346.52, 346.53, 346.6, 346.60, 346.61, 346.62, 346.63, 346.7, 346.70, 346.71, 346.72, 346.73, 346.8, 346.80, 346.81, 346.82, 346.83, 346.9, 346.90, 346.91, 346.92, 346.93), G44 (339, 339.0, 339.00, 339.01, 339.02, 339.03, 339.04, 339.05, 339.09, 339.1, 339.10, 339.11, 339.12, 339.2, 339.20, 339.21, 339.22, 339.3, 339.4, 339.41, 339.42, 339.43, 339.44, 339.8, 339.81, 339.82, 339.83, 339.84, 339.85, 339.89, 784.0, 307.81), R51 (784.0) |
| Myalgia                    | M60 (728.0, 728.81, 728.82, 729.1), M79.1 (729.1)                                                                                                                                                                                                                                                                                                                                                                                                                                                                                                                                                                                                                                        |

**Supplemental Table 6.** Set of covariates for the propensity score match

| <b>Variable</b>                    | <b>Definition</b>                                      | <b>Code Type</b> | <b>Code</b>                                                                                                                                                                                                                                                |
|------------------------------------|--------------------------------------------------------|------------------|------------------------------------------------------------------------------------------------------------------------------------------------------------------------------------------------------------------------------------------------------------|
| Age                                | Time of diagnosis                                      | HCO defined      | year_of_birth                                                                                                                                                                                                                                              |
| Sex                                | Female                                                 | HL-7             | F                                                                                                                                                                                                                                                          |
|                                    | Male                                                   |                  | M                                                                                                                                                                                                                                                          |
|                                    | Unknown                                                |                  | U                                                                                                                                                                                                                                                          |
| Race                               | White                                                  | HL-7             | 2106-3                                                                                                                                                                                                                                                     |
|                                    | Black/African American                                 |                  | 2054-5                                                                                                                                                                                                                                                     |
|                                    | American Indian/Alaska Native                          |                  | 1002-5                                                                                                                                                                                                                                                     |
|                                    | Asian                                                  |                  | 2028-9                                                                                                                                                                                                                                                     |
|                                    | Native Hawaiian/Pacific Islander                       |                  | 2076-8                                                                                                                                                                                                                                                     |
|                                    | Unknown race                                           |                  | 2131-1                                                                                                                                                                                                                                                     |
|                                    | Ethnicity                                              |                  | Hispanic/Latino                                                                                                                                                                                                                                            |
| Not Hispanic/Latino                |                                                        | 2186-5           |                                                                                                                                                                                                                                                            |
| Unknown Ethnicity                  |                                                        |                  |                                                                                                                                                                                                                                                            |
| Socioeconomic status               | Problems related to housing and economic circumstances | ICD-10 (ICD-9)   | Z59 (V60.8, V60, V60.9, V60.89, V60.2, V60.6, V60.1, V60.0)                                                                                                                                                                                                |
| Diabetes mellitus                  | Type 1 diabetes mellitus                               | ICD-10 (ICD-9)   | E10 (250.11, 250.13, 250.31, 250.33, 250.43, 250.41, 250.51, 250.53, 366.41, 250.61, 250.63, 357.2, 250.73, 250.71, 250.81, 250.03, 250.23, 250.83, 250.01, 250.91, 250.93, 250.21)                                                                        |
|                                    | Type 2 diabetes mellitus                               |                  | E11 (250.00, 250.90, 250.92, 250.82, 250.80, 250.12, 250.10, 250.62, 250.52, 250.72, 250.70, 250.42, 250.32, 250.22, 250.12, 250.02, 250.30, 357.2, 250.60, 362.0, 250.50, 366.41, 362.02, 362.06, 362.05, 362.04, 362.03, 362.01, 362.07, 250.40, 250.20) |
| Chronic lower respiratory diseases | Bronchitis, not specified as acute or chronic          | ICD-10 (ICD-9)   | J40 (490)                                                                                                                                                                                                                                                  |
|                                    | Simple and mucopurulent chronic bronchitis             |                  | J41 (491.0, 491.1, 491.8)                                                                                                                                                                                                                                  |
|                                    | Unspecified chronic bronchitis                         |                  | J42 (491, 491.9)                                                                                                                                                                                                                                           |
|                                    | Emphysema                                              |                  | J43 (492, 492.0, 492.8)                                                                                                                                                                                                                                    |

|                        |                                                                     |                |                                                                                                                               |
|------------------------|---------------------------------------------------------------------|----------------|-------------------------------------------------------------------------------------------------------------------------------|
|                        | Other chronic obstructive pulmonary disease                         |                | J44 (491.2, 493.2, 491.22, 493.21, 491.21, 493.22, 491.20, 493.20, 496)                                                       |
|                        | Asthma                                                              |                | J45 (493, 493.00, 493.10, 493.02, 493.12, 493.01, 493.11, 493.0, 493.1, 493.92, 493.91, 493.90, 493.81, 493.82, 493.8, 493.9) |
|                        | Bronchiectasis                                                      |                | J47 (494, 494.0, 494.1)                                                                                                       |
| Nicotine dependence    | Nicotine dependence                                                 | ICD-10 (ICD-9) | F17.2 (305.1, 292.89, 292.8)                                                                                                  |
| Substance use disorder | Mental and behavioral disorders due to psychoactive substance abuse | ICD-10 (ICD-9) | F10-F19 <sup>a</sup>                                                                                                          |
| Heart disease          | Ischemic heart disease                                              | ICD-10 (ICD-9) | I20-I25 <sup>b</sup>                                                                                                          |
|                        | Other forms of heart disease                                        |                | I30-I-52 <sup>c</sup>                                                                                                         |
| Chronic kidney disease | Chronic kidney disease                                              | ICD-10 (ICD-9) | N18 (585, 585.9, 585.6, 585.5, 585.4, 585.3, 585.2, 585.1)                                                                    |
|                        | Hypertensive chronic kidney disease                                 |                | I12 (403, 403.0, 403.00, 403.1, 403.01, 403.10, 403.11, 403.9, 403.90, 403.91)                                                |
| Chronic liver disease  | Alcoholic liver disease                                             | ICD-10 (ICD-9) | K70 (571.3, 571.2, 571.1, 571.0)                                                                                              |
|                        | Hepatic failure, not elsewhere classified                           |                | K72 (572.2, 572.8, 570)                                                                                                       |
|                        | Chronic hepatitis, not elsewhere classified                         |                | K73 (571.4, 571.40, 571.49, 571.41)                                                                                           |
|                        | Fibrosis and cirrhosis of liver                                     |                | K74 (571, 571.5, 571.6, 571.9)                                                                                                |
|                        | Fatty (change of) liver, not elsewhere classified                   |                | K76.0 (571.8)                                                                                                                 |
|                        | Chronic passive congestion of liver                                 |                | K76.1 (573.0, 573.8)                                                                                                          |
|                        | Portal hypertension                                                 |                | K76.6 (572.3)                                                                                                                 |
|                        | Other specified diseases of liver                                   |                | K76.8 (573.5, 571.8, 573.8)                                                                                                   |
| Stroke                 | Cerebral infarction                                                 | ICD-10 (ICD-9) | I63: (433.31, 433.81, 434.91, 434.11, 433.11, 434.01, 433.01, 433.21, 433.91)                                                 |
| Dementia               | Vascular dementia                                                   | ICD-10 (ICD-9) | F01 (290.4, 290.40, 290.41, 290.42, 290.43)                                                                                   |
|                        | Dementia in other diseases classified elsewhere                     |                | F02 (294.1, 294.10, 294.11)                                                                                                   |

|                                         |                                                                   |                |                                                                                                                                                                                                                                                                                                                                  |
|-----------------------------------------|-------------------------------------------------------------------|----------------|----------------------------------------------------------------------------------------------------------------------------------------------------------------------------------------------------------------------------------------------------------------------------------------------------------------------------------|
|                                         | Unspecified dementia                                              |                | F03 (290, 290.0, 290.10, 290.11, 290.12, 290.13, 290.20, 290.21, 290.3, 290.8, 290.9 294.2, 294.20, 294.21)                                                                                                                                                                                                                      |
|                                         | Alzheimer's disease                                               |                | G30 (331.0)                                                                                                                                                                                                                                                                                                                      |
|                                         | Frontotemporal dementia                                           |                | G31.0 (331.11, 331.19, 331.1)                                                                                                                                                                                                                                                                                                    |
|                                         | Dementia with Lewy bodies                                         |                | G31.83 (331.82)                                                                                                                                                                                                                                                                                                                  |
| Cancer and hematological cancer         | Neoplasms                                                         | ICD-10 (ICD-9) | C00-D49 (140-239)                                                                                                                                                                                                                                                                                                                |
|                                         | Malignant neoplasms of lymphoid, hematopoietic and related tissue |                | C81-C96 <sup>d</sup>                                                                                                                                                                                                                                                                                                             |
| Organ transplant                        | Renal transplantation procedures                                  | CPT            | 1008098                                                                                                                                                                                                                                                                                                                          |
|                                         | Liver transplantation procedures                                  |                | 1007811                                                                                                                                                                                                                                                                                                                          |
| Rheumatoid arthritis                    | Rheumatoid arthritis with rheumatoid factor                       | ICD-10 (ICD-9) | M05 (714.1, 714.2, 714.81)                                                                                                                                                                                                                                                                                                       |
|                                         | Other rheumatoid arthritis                                        | ICD-10 (ICD-9) | M06 (714, 714.8, 714.0, 714.89, 714.9, 714.2)                                                                                                                                                                                                                                                                                    |
| Lupus                                   | Lupus                                                             | ICD-10 (ICD-9) | M32 (710.0)                                                                                                                                                                                                                                                                                                                      |
| Psoriasis                               | Psoriasis                                                         | ICD-10 (ICD-9) | L40 (694.3, 696, 696.0, 696.1)                                                                                                                                                                                                                                                                                                   |
| Disorders involving an immune mechanism | Certain disorders involving the immune mechanism                  | ICD-10 (ICD-9) | D80-D89                                                                                                                                                                                                                                                                                                                          |
|                                         |                                                                   |                | D80: (279.0, 279.1, 279.00, 279.01, 279.02, 279.03, 279.04, 279.05, 279.09, 279.19)<br>D81: (279.2, 279.13)<br>D82: (279.11, 279.12)<br>D83: (279.06, 279.10)<br>D84: (277.6, 279.8, 279.3)<br>D86: (135)<br>D89: (273.0, 273.2, 289.89, 279.5, 279.50, 279.51, 279.52, 279.53, 279.41, 279.49, 279.8, 279.4, 279.9, 279, 289.8) |



---

<sup>a</sup>F10: 305.0, 305.00, 305.01, 305.02, 305.03, 291.89, 291.8, 291.82, 303.90, 303.91, 303.92, 303.93, 303.0, 303.00, 303.01, 303.02, 303.03, 291.0, 291.81, 291.89, 291.8, 291.2, 291.89, 291.82, 303.9, 291.4, 291.5, 291.3, 291.89, 291.8, 291.1, 291.89, 291.82, 291.8, 291.9, 291, 303  
F11: 305.5, 305.50, 305.51, 305.52, 305.53, 292.89, 292.8, 292.85, 304.00, 304.01, 304.02, 304.03, 292.89, 292.8, 292.85, 304.0, 292.89, 292.8  
F12: 305.20, 305.21, 305.22, 305.23, 292.89, 292.8, 304.30, 304.31, 304.32, 304.33, 292.89, 292.8, 304.3, 305.21, 305.22, 305.23, 305.2  
F13: 305.4, 305.40, 305.41, 305.42, 305.43, 292.89, 292.8, 292.85, 304.10, 304.11, 304.12, 304.13, 304.1  
F14: 305.6, 305.60, 305.61, 305.62, 305.63, 292.89, 292.8, 292.85, 304.20, 304.21, 304.22, 304.23, 304.2  
F15: 305.7, 305.70, 305.71, 305.72, 305.73, 292.89, 292.8, 292.85, 304.40, 304.41, 304.42, 304.43, 304.4, 292.2  
F16: 305.3, 305.30, 305.31, 305.32, 305.33, 292.89, 292.8, 304.50, 304.51, 304.52, 304.53, 304.5  
F17: 305.1, 292.89, 292.8  
F18: 305.9, 305.90, 305.91, 305.92, 305.93, 292.89, 292.8, 305  
F19: 304, 305.80, 305.81, 305.82, 305.83, 292.89, 292.8, 292.85, 304.60, 304.61, 304.62, 304.70, 304.71, 304.72, 304.80, 304.81, 304.82, 304.90, 304.91, 304.92, 304.63, 304.73, 304.83, 304.93, 304.6, 304.7, 304.8, 304.9, 292.81, 292.0, 292.84, 292.11, 292.12, 292.1, 292.83, 292.82, 292.9, 292  
<sup>b</sup>I20-I25: 411, 413, 413.9, 413.0, 413.1, 411.1, 410, 410.7, 410.70, 410.71, 410.72, 410.9, 410.90, 410.91, 410.92, 410.82, 410.81, 410.80, 410.8, 410.62, 410.61, 410.60, 410.6, 410.52, 410.51, 410.50, 410.5, 410.42, 410.41, 410.40, 410.4, 410.22, 410.21, 410.20, 410.2, 410.32, 410.31, 410.30, 410.3, 410.12, 410.11, 410.10, 410.1, 410.02, 410.01, 410.00, 410.0, 429.79, 429.7, 411.81, 411.0, 411.89, 411.8, 414.9, 414.1, 414.0, 414, 414.8, 414.4, 414.3, 414.2, 414.07, 414.06, 414.02, 414.03, 414.04, 414.05, 414.8, 414.12, 414.11, 414.19, 414.10, 412, 429.2, 414.01, 414.00  
<sup>c</sup>I30-I-52: 420.91, 420.99, 420.90, 420, 420.9, 423.1, 423.2, 423.0, 423.3, 423.8, 423.9, 423, 420.0, 421.0, 421.9, 421, 424.0, 424.1, 424.2, 424.3, 424, 424.9, 424.90, 424.99, 424.91, 421.1, 115.94, 115.14, 115.04, 422.9, 422, 422.90, 422.93, 422.99, 422.91, 422.92, 422.0, 425.11, 425.18, 425.0, 425.3, 425.4, 425.5, 425.9, 425.2, 425.4, 425, 425.1, 425.7, 425.8, 426.1, 426.3, 426.2, 426.50, 426.10, 426.0, 426.13, 426.12, 426.11, 426, 426.9, 426.8, 426.89, 426.82, 426.81, 426.7, 426.6, 426.50, 426.54, 426.53, 426.52, 426.51, 426.4, 427.5, 427.0, 427.1, 427.2, 427.31, 427.32, 427.3, 427, 427.6, 427.8, 427.9, 427.89, 427.81, 427.6, 427.69, 427.60, 427.61, 427.4, 427.42, 427.41, 428, 428.0, 428.9, 428.4, 428.43, 428.42, 428.41, 428.40, 428.3, 428.33, 428.32, 428.31, 428.30, 428.2, 428.23, 428.22, 428.21, 428.20, 428.1, 429, 429.8, 429.9, 429.8, 429.81, 429.82, 429.89, 429.8, 429.83, 429.3, 429.1, 429.0, 429.89, 429.6, 429.5, 429.71

<sup>d</sup>C81: 201, 201.0, 201.00, 201.01, 201.02, 201.03, 201.04, 201.05, 201.06, 201.08, 201.1, 201.10, 201.11, 201.12, 201.13, 201.14, 201.15, 201.17, 201.18, 201.2, 201.20, 201.21, 201.22, 201.23, 201.24, 201.25, 201.26, 201.27, 201.28, 201.4, 201.40, 201.41, 201.42, 201.43, 201.44, 201.45, 201.46, 201.47, 201.48, 201.5, 201.50, 201.51, 201.52, 201.53, 201.54, 201.55, 201.56, 201.57, 201.58, 201.6, 201.60, 201.61, 201.62, 201.63, 201.64, 201.65, 201.66, 201.67, 201.68, 201.7, 201.70, 201.71, 201.72, 201.73, 201.74, 201.75, 201.76, 201.77, 201.78, 201.9, 201.90, 201.91, 201.93, 201.94, 201.95, 201.96, 201.97, 201.98  
C82: 202.0, 202.00, 202.01, 202.02, 202.03, 202.04, 202.05, 202.06, 202.07, 202.08  
C83: 200.0, 200.1, 200.00, 200.01, 200.02, 200.03, 200.05, 200.06, 200.07, 200.08, 200.10, 200.11, 200.12, 200.14, 200.15, 200.16, 200.17, 200.18, 200.20, 200.21, 200.22, 200.23, 200.24, 200.25, 200.26, 200.27, 200.28, 200.3, 200.30, 200.31, 200.32, 200.33, 200.34, 200.35, 200.36, 200.37, 200.38, 200.4, 200.40, 200.41, 200.42, 200.43, 200.44, 200.45, 200.46, 200.47, 200.48, 200.5, 200.50, 200.51, 200.52, 200.53, 200.54, 200.55, 200.56, 200.57, 200.58, 200.7, 200.70, 200.71, 200.72, 200.73, 200.75, 200.76, 200.77, 200.78, 200.8, 200.80, 200.81, 200.82, 200.83, 200.84, 200.85, 200.86, 200.87, 200.88  
C84: 200.6, 200.60, 200.61, 200.62, 200.63, 200.64, 200.65, 200.66, 200.67, 200.68, 202.1, 202.10, 202.11, 202.12, 202.13, 202.14, 202.15, 202.16, 202.17, 202.18, 202.2, 202.20, 202.20, 202.21, 202.22, 202.23, 202.24, 202.25, 202.26, 202.27, 202.28, 202.7, 202.70, 202.71, 202.72, 202.73, 202.74, 202.75, 202.76, 202.77, 202.78, 202.83  
C85: 202.80, 202.81, 202.82, 202.83, 202.84, 202.85, 202.86, 202.87, 202.88  
C86: -  
C88: 273.3, 203.80, 203.82  
C90: 203.0, 203.00, 203.01, 203.02, 203.1, 203.10, 203.11, 203.12, 203.80, 203.81, 203.82  
C91: 202.4, 202.40, 202.41, 202.42, 202.43, 202.45, 202.46, 202.47, 202.48, 204, 204.0, 204.00, 204.01, 204.02, 204.1, 204.10, 204.11, 204.12, 204.2, 204.20, 204.21, 204.22, 204.8, 204.80, 204.81, 204.82, 204.9, 204.90, 204.91, 204.92  
C92: 205, 205.0, 205.00, 205.01, 205.02, 205.10, 205.11, 205.12, 205.1, 205.2, 205.20, 205.21, 205.22, 205.3, 205.30, 205.31, 205.32, 205.8, 205.80, 205.81, 205.82, 205.9, 205.90, 205.91, 205.92  
C93: 206, 206.0, 206.00, 206.01, 206.02, 206.1, 206.10, 206.11, 206.12, 206.2, 206.20, 206.21, 206.22, 206.8, 206.80, 206.81, 206.82, 206.9, 206.90, 206.91, 206.92  
C94: 207, 207.0, 207.00, 207.01, 207.02, 207.2, 207.20, 207.21, 207.22, 207.8, 207.80, 207.81, 207.82, 238.7, 238.79  
C95: 208, 208.0, 208.00, 208.01, 208.02, 208.1, 208.10, 208.11, 208.12, 208.2, 208.20, 208.21, 208.22, 208.8, 208.80, 208.81, 208.82, 208.9, 208.90, 208.91, 208.92  
C96: 202.5, 202.50, 202.51, 202.52, 202.53, 202.54, 202.55, 202.57, 202.58, 202.6, 202.60, 202.61, 202.62, 202.63, 202.64, 202.65, 202.66, 202.67, 202.68, 202.90, 202.91, 202.92, 202.93, 202.94, 202.95, 202.96, 202.97, 202.98, 202.3, 202.30, 202.31, 202.32, 202.33, 202.34, 202.35, 202.36, 202.37, 202.38, 202, 202.9, 277.8, 277.89  
<sup>e</sup>I30-I-52: 420.91, 420.99, 420.90, 420, 420.9, 423.1, 423.2, 423.0, 423.3, 423.8, 423.9, 423, 420.0, 421.0, 421.9, 421, 424.0, 424.1, 424.2, 424.3, 424, 424.9, 424.90, 424.99, 424.91, 421.1, 115.94, 115.14, 115.04, 422.9, 422, 422.90, 422.93, 422.99, 422.91, 422.92, 422.0, 425.11, 425.18, 425.0, 425.3, 425.4, 425.5, 425.9, 425.2, 425.4, 425, 425.1, 425.7, 425.8, 426.1, 426.3, 426.2, 426.50, 426.10, 426.0, 426.13, 426.12, 426.11, 426, 426.9, 426.8, 426.89, 426.82, 426.81, 426.7, 426.6, 426.50, 426.54, 426.53, 426.52, 426.51, 426.4, 427.5, 427.0, 427.1, 427.2, 427.31, 427.32, 427.3, 427, 427.6, 427.8, 427.9, 427.89, 427.81, 427.6, 427.69, 427.60, 427.61, 427.4, 427.42, 427.41, 428, 428.0, 428.9, 428.4, 428.43, 428.42, 428.41, 428.40, 428.3, 428.33, 428.32, 428.31, 428.30, 428.2, 428.23, 428.22, 428.21, 428.20, 428.1, 429, 429.8, 429.9, 429.8, 429.81, 429.82, 429.89, 429.8, 429.83, 429.3, 429.1, 429.0, 429.89, 429.6, 429.5, 429.71

**Supplemental Table 7a.** The risk ratios for COPC on long COVID features in the COVID cohort<sup>a</sup>

| <b>Long COVID defined as 3 or more features</b> |                  |          |                     |          |                   |                 |
|-------------------------------------------------|------------------|----------|---------------------|----------|-------------------|-----------------|
| <b>Long COVID features</b>                      | <b>With COPC</b> |          | <b>Without COPC</b> |          | <b>Risk Ratio</b> | <b>(95% CI)</b> |
|                                                 | <b>n</b>         | <b>%</b> | <b>n</b>            | <b>%</b> |                   |                 |
| All long COVID features                         | 74,946           | 20.4%    | 34,869              | 9.5%     | 1.68              | (1.66, 1.69)    |
| Chest/Throat Pain                               | 36,259           | 9.9%     | 17,963              | 4.9%     | 1.55              | (1.53, 1.57)    |
| Abnormal Breathing                              | 44,132           | 12.0%    | 23,104              | 6.3%     | 1.50              | (1.48, 1.52)    |
| Abdominal Symptoms                              | 40,616           | 11.1%    | 19,406              | 5.3%     | 1.60              | (1.58, 1.61)    |
| Fatigue                                         | 37,302           | 10.2%    | 19,246              | 5.2%     | 1.51              | (1.49, 1.53)    |
| Anxiety/Depression                              | 50,023           | 13.6%    | 21,255              | 5.8%     | 1.75              | (1.73, 1.77)    |
| Anxiety                                         | 39,138           | 10.7%    | 16,238              | 4.4%     | 1.76              | (1.74, 1.79)    |
| Depression                                      | 35,331           | 9.6%     | 14,611              | 4.0%     | 1.76              | (1.74, 1.79)    |
| Pain                                            | 40,937           | 11.1%    | 16,874              | 4.6%     | 1.77              | (1.75, 1.80)    |
| Headache                                        | 37,436           | 10.2%    | 12,703              | 3.5%     | 2.04              | (2.01, 2.08)    |
| Cognitive Symptoms                              | 18,373           | 5.0%     | 10,365              | 2.8%     | 1.40              | (1.38, 1.42)    |
| Myalgia                                         | 16,317           | 4.4%     | 6,983               | 1.9%     | 1.69              | (1.66, 1.72)    |
| <b>Long COVID defined as 4 or more features</b> |                  |          |                     |          |                   |                 |
| <b>Long COVID features</b>                      | <b>With COPC</b> |          | <b>Without COPC</b> |          | <b>Risk Ratio</b> | <b>(95% CI)</b> |
|                                                 | <b>n</b>         | <b>%</b> | <b>n</b>            | <b>%</b> |                   |                 |
| All long COVID features                         | 45,589           | 12.4%    | 19,851              | 5.4%     | 1.71              | (1.69, 1.73)    |
| Chest/Throat Pain                               | 28,109           | 7.7%     | 13,212              | 3.6%     | 1.60              | (1.57, 1.62)    |
| Abnormal Breathing                              | 33,095           | 9.0%     | 16,037              | 4.4%     | 1.57              | (1.55, 1.59)    |
| Abdominal Symptoms                              | 30,489           | 8.3%     | 13,970              | 3.8%     | 1.63              | (1.61, 1.65)    |
| Fatigue                                         | 28,474           | 7.8%     | 13,657              | 3.7%     | 1.58              | (1.55, 1.60)    |
| Anxiety/Depression                              | 33,104           | 9.0%     | 12,958              | 3.5%     | 1.83              | (1.80, 1.86)    |
| Anxiety                                         | 26,373           | 7.2%     | 9,947               | 2.7%     | 1.87              | (1.84, 1.90)    |
| Depression                                      | 24,346           | 6.6%     | 9,216               | 2.5%     | 1.86              | (1.83, 1.89)    |
| Pain                                            | 30,493           | 8.3%     | 12,686              | 3.5%     | 1.75              | (1.72, 1.77)    |
| Headache                                        | 27,667           | 7.5%     | 10,168              | 2.8%     | 1.91              | (1.88, 1.94)    |
| Cognitive Symptoms                              | 14,683           | 4.0%     | 7,457               | 2.0%     | 1.50              | (1.47, 1.53)    |
| Myalgia                                         | 14,041           | 3.8%     | 6,089               | 1.7%     | 1.67              | (1.64, 1.71)    |

<sup>a</sup>n = 734,722 patients

**Supplemental Table 7b.** The risk ratios for COPC on long COVID features in the influenza cohort<sup>a</sup>

| <b>Long COVID defined as 3 or more features</b> |                         |          |                            |          |            |              |
|-------------------------------------------------|-------------------------|----------|----------------------------|----------|------------|--------------|
|                                                 | With COPC<br>n = 90,901 |          | Without COPC<br>n = 90,901 |          | Risk Ratio | (95% CI)     |
| <b>Long COVID features</b>                      | <b>n</b>                | <b>%</b> | <b>n</b>                   | <b>%</b> |            |              |
| All long COVID features                         | 35,949                  | 39.5%    | 24,332                     | 26.8%    | 1.36       | (1.34, 1.37) |
| Chest/Throat Pain                               | 25,849                  | 28.4%    | 18,396                     | 20.2%    | 1.27       | (1.25, 1.28) |
| Abnormal Breathing                              | 29,209                  | 32.1%    | 20,986                     | 23.1%    | 1.27       | (1.26, 1.29) |
| Abdominal Symptoms                              | 27,393                  | 30.1%    | 19,005                     | 20.9%    | 1.30       | (1.28, 1.31) |
| Fatigue                                         | 24,038                  | 26.4%    | 16,771                     | 18.4%    | 1.28       | (1.26, 1.30) |
| Anxiety/Depression                              | 23,964                  | 26.4%    | 14,178                     | 15.6%    | 1.44       | (1.42, 1.46) |
| Anxiety                                         | 18,660                  | 20.5%    | 10,518                     | 11.6%    | 1.46       | (1.44, 1.48) |
| Depression                                      | 17,266                  | 19.0%    | 9,799                      | 10.8%    | 1.45       | (1.42, 1.47) |
| Pain                                            | 29,633                  | 32.6%    | 20,002                     | 22.0%    | 1.33       | (1.32, 1.35) |
| Headache                                        | 24,373                  | 26.8%    | 14,715                     | 16.2%    | 1.42       | (1.40, 1.44) |
| Cognitive Symptoms                              | 13,378                  | 14.7%    | 9,122                      | 10.0%    | 1.27       | (1.25, 1.29) |
| Myalgia                                         | 14,996                  | 16.5%    | 9,566                      | 10.5%    | 1.33       | (1.31, 1.35) |
| <b>Long COVID defined as 4 or more symptoms</b> |                         |          |                            |          |            |              |
|                                                 | With COPC<br>n = 90,901 |          | Without COPC<br>n = 90,901 |          | Risk Ratio | (95% CI)     |
| <b>Long COVID features</b>                      | <b>n</b>                | <b>%</b> | <b>n</b>                   | <b>%</b> |            |              |
| All long COVID features                         | 30,039                  | 33.0%    | 20,205                     | 22.2%    | 1.34       | (1.32, 1.35) |
| Chest/Throat Pain                               | 24,348                  | 26.8%    | 17,138                     | 18.9%    | 1.27       | (1.26, 1.29) |
| Abnormal Breathing                              | 26,859                  | 29.5%    | 18,824                     | 20.7%    | 1.29       | (1.27, 1.30) |
| Abdominal Symptoms                              | 25,183                  | 27.7%    | 17,388                     | 19.1%    | 1.29       | (1.28, 1.31) |
| Fatigue                                         | 22,492                  | 24.7%    | 15,592                     | 17.2%    | 1.28       | (1.26, 1.30) |
| Anxiety/Depression                              | 21,029                  | 23.1%    | 12,395                     | 13.6%    | 1.43       | (1.41, 1.45) |
| Anxiety                                         | 16,549                  | 18.2%    | 9,256                      | 10.2%    | 1.46       | (1.43, 1.48) |
| Depression                                      | 15,265                  | 16.8%    | 8,585                      | 9.4%     | 1.45       | (1.42, 1.47) |
| Pain                                            | 26,641                  | 29.3%    | 17,929                     | 19.7%    | 1.32       | (1.31, 1.34) |
| Headache                                        | 22,548                  | 24.8%    | 13,976                     | 15.4%    | 1.38       | (1.36, 1.40) |
| Cognitive Symptoms                              | 12,716                  | 14.0%    | 8,495                      | 9.3%     | 1.28       | (1.26, 1.30) |
| Myalgia                                         | 14,464                  | 15.9%    | 9,316                      | 10.2%    | 1.32       | (1.30, 1.34) |

<sup>a</sup>n = 181,802 patients

**Supplemental Table 7c.** The risk ratios for COPC on long COVID features in the non-infected cohort<sup>a</sup>

| <b>Long COVID defined as 3 or more features</b> |             |          |              |          |                   |                 |
|-------------------------------------------------|-------------|----------|--------------|----------|-------------------|-----------------|
|                                                 | With COPC   |          | Without COPC |          |                   |                 |
|                                                 | n = 257,384 |          | n = 257,384  |          |                   |                 |
| <b>Long COVID features</b>                      | <b>n</b>    | <b>%</b> | <b>n</b>     | <b>%</b> | <b>Risk Ratio</b> | <b>(95% CI)</b> |
| All long COVID features                         | 8,451       | 3.3%     | 2,598        | 1.0%     | 1.57              | (1.56, 1.59)    |
| Chest/Throat Pain                               | 2,315       | 0.9%     | 903          | 0.4%     | 1.45              | (1.41, 1.49)    |
| Abnormal Breathing                              | 2,502       | 1.0%     | 1,068        | 0.4%     | 1.36              | (1.32, 1.40)    |
| Abdominal Symptoms                              | 3,498       | 1.4%     | 1,222        | 0.5%     | 1.45              | (1.43, 1.48)    |
| Fatigue                                         | 2,800       | 1.1%     | 1,077        | 0.4%     | 1.47              | (1.43, 1.51)    |
| Anxiety/Depression                              | 6,183       | 2.4%     | 1,803        | 0.7%     | 1.40              | (1.38, 1.42)    |
| Anxiety                                         | 5,102       | 2.0%     | 1,519        | 0.6%     | 1.38              | (1.36, 1.40)    |
| Depression                                      | 4,521       | 1.8%     | 1,286        | 0.5%     | 1.49              | (1.46, 1.52)    |
| Pain                                            | 4,015       | 1.6%     | 1,093        | 0.4%     | 1.94              | (1.90, 1.99)    |
| Headache                                        | 3,933       | 1.5%     | 729          | 0.3%     | 3.36              | (3.24, 3.48)    |
| Cognitive Symptoms                              | 1,267       | 0.5%     | 491          | 0.2%     | 1.34              | (1.30, 1.40)    |
| Myalgia                                         | 1,367       | 0.5%     | 310          | 0.1%     | 2.34              | (2.21, 2.48)    |
| <b>Long COVID defined as 4 or more features</b> |             |          |              |          |                   |                 |
|                                                 | With COPC   |          | Without COPC |          |                   |                 |
|                                                 | n = 257,384 |          | n = 257,384  |          |                   |                 |
| <b>Long COVID features</b>                      | <b>n</b>    | <b>%</b> | <b>n</b>     | <b>%</b> | <b>Risk Ratio</b> | <b>(95% CI)</b> |
| All long COVID features                         | 3,195       | 1.2%     | 897          | 0.3%     | 1.57              | (1.56, 1.59)    |
| Chest/Throat Pain                               | 1,361       | 0.5%     | 530          | 0.2%     | 1.45              | (1.41, 1.49)    |
| Abnormal Breathing                              | 1,526       | 0.6%     | 586          | 0.2%     | 1.36              | (1.32, 1.40)    |
| Abdominal Symptoms                              | 1,833       | 0.7%     | 607          | 0.2%     | 1.45              | (1.43, 1.48)    |
| Fatigue                                         | 1,521       | 0.6%     | 519          | 0.2%     | 1.47              | (1.43, 1.51)    |
| Anxiety/Depression                              | 2,427       | 0.9%     | 603          | 0.2%     | 1.40              | (1.38, 1.42)    |
| Anxiety                                         | 2,045       | 0.8%     | 496          | 0.2%     | 1.38              | (1.36, 1.40)    |
| Depression                                      | 1,857       | 0.7%     | 441          | 0.2%     | 1.49              | (1.46, 1.52)    |
| Pain                                            | 2,050       | 0.8%     | 566          | 0.2%     | 1.94              | (1.90, 1.99)    |
| Headache                                        | 1,830       | 0.7%     | 406          | 0.2%     | 3.36              | (3.24, 3.48)    |
| Cognitive Symptoms                              | 711         | 0.3%     | 237          | 0.1%     | 1.34              | (1.30, 1.40)    |
| Myalgia                                         | 818         | 0.3%     | 207          | 0.1%     | 2.34              | (2.21, 2.48)    |

<sup>a</sup>n = 514,758 patients
